# Supplementary material for: Development of a novel one-pot synthetic method for the preparation of (Mn0.2Ni0.4Zn0.4Fe2O4)x–(BaFe12O19)1−xnanocomposites and the study of their microwave absorption and magnetic properties
Source: Royal Society of Chemistry journal article supplement (doi:10.1039/c4ra07145j), 2014-09-05
Supplement: c4ra07145j1.pdf [file c4ra07145j1.pdf]

## Electronic Supplementary Information (ESI)

# Development of a Novel 'One-Pot' Synthetic Method for Preparation of $(\text{Mn}_{0.2}\text{Ni}_{0.4}\text{Zn}_{0.4}\text{Fe}_2\text{O}_4)_x-(\text{BaFe}_{12}\text{O}_{19})_{1-x}$ nanocomposites and Study of their Microwave Absorption and Magnetic Properties

Subhenjit Hazra<sup>a</sup>, Barun Kumar Ghosh<sup>a</sup>, Hrishikesh Ravindra Joshi<sup>a</sup>, Manoj Kumar Patra<sup>b</sup>, Raj Kumar Jani<sup>b</sup>, Sampat Raj Vadera<sup>b</sup>, Narendra Nath Ghosh<sup>a\*</sup>

Corresponding author. Tel./fax: +91 832 2580318/2557033. E-mail address: naren70@yahoo.com (N. N. Ghosh)

Room temperature M-H curves, measured using VSM, for  $(\text{Mn}_{0.2}\text{Ni}_{0.4}\text{Zn}_{0.4}\text{Fe}_2\text{O}_4)_x-(\text{BaFe}_{12}\text{O}_{19})_{1-x}$  nanocomposites ( $X=0.85, 0.75, 0.5, 0.25$ ) prepared by one-pot and physical mixing method are shown below:

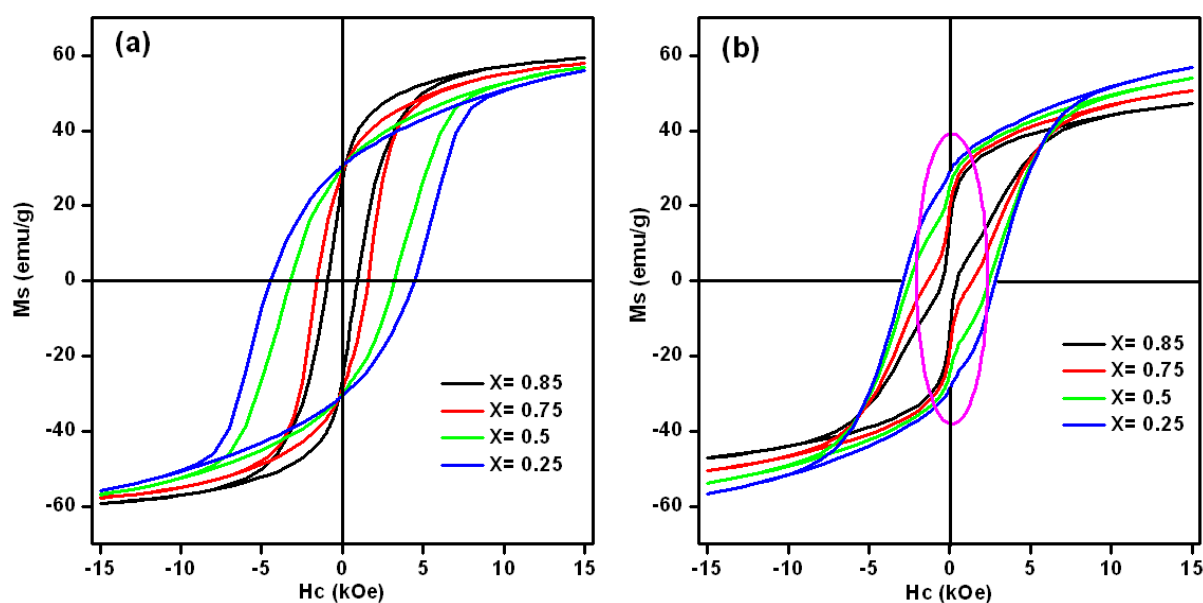

Fig. S1: Room temperature hysteresis loops for  $(\text{Mn}_{0.2}\text{Ni}_{0.4}\text{Zn}_{0.4}\text{Fe}_2\text{O}_4)_x-(\text{BaFe}_{12}\text{O}_{19})_{1-x}$  nanocomposites ( $X=0.85, 0.75, 0.5, 0.25$ ) prepared by (a) one-pot and (b) physical mixing method.
